# Supplementary material for: Atg7- and Keap1-dependent autophagy protects breast cancer cell lines against mitoquinone-induced oxidative stress
Source: PubMed Central journal article supplement (PMC4039229; doi:10.18632/oncotarget.1715), 2014-03-12
Supplement: oncotarget-05-1526-s001.pdf [file oncotarget-05-1526-s001.pdf]

**Supplementary Table S1: Regulation of antioxidant gene expression following MitoQ treatment in mouse embryonic fibroblasts.**

| Gene name                             | Symbol            | Atg7 <sup>+/+</sup> MEF<br>MitoQ-treated <sup>a</sup> | Atg7 <sup>-/-</sup> MEF<br>MitoQ-treated <sup>b</sup> | Atg7 <sup>-/-</sup> MEF<br>Basal levels <sup>c</sup> |
|---------------------------------------|-------------------|-------------------------------------------------------|-------------------------------------------------------|------------------------------------------------------|
| Chemokine (C-C motif) ligand 5        | <i>Ccl5</i>       | 2.9773                                                | 2.7587                                                | 1.2816                                               |
| EH-domain containing 2                | <i>Ehd2</i>       | -2.8206                                               | -1.554                                                | -1.1583                                              |
| Heme oxygenase (decycling) 1          | <i>Hmox1</i>      | 17.196                                                | 11.6641                                               | -5.2488                                              |
| Heat shock protein 1A                 | <i>Hspa1a</i>     | 9.5401                                                | 1.7219                                                | 16.5413                                              |
| Peroxiredoxin 1                       | <i>Prdx1</i>      | -1.9132                                               | -2.5245                                               | -1.2588                                              |
| Peroxiredoxin 2                       | <i>Prdx2</i>      | -1.3435                                               | -1.3717                                               | -2.9526                                              |
| Prion protein                         | <i>Prnp</i>       | 2.0763                                                | 2.6833                                                | -1.9079                                              |
| Prostaglandin-endoperoxide synthase 1 | <i>Ptgs1</i>      | 1.9779                                                | -1.3623                                               | -3.6351                                              |
| Prostaglandin-endoperoxide synthase 2 | <i>Ptgs2</i>      | 7.9118                                                | 8.5386                                                | 1.0483                                               |
| RecQ protein-like 4                   | <i>Recq14</i>     | 2.9567                                                | 2.521                                                 | -1.3775                                              |
| Superoxide dismutase 3, extracellular | <i>Sod3</i>       | 1.9106                                                | -2.0364                                               | 1.3736                                               |
| Sequestosome 1                        | <i>P62/Sqstm1</i> | 4.8032                                                | 3.9014                                                | 1.0196                                               |
| Thioredoxin interacting protein       | <i>Txnip</i>      | -6.8022                                               | -9.038                                                | 2.425                                                |

<sup>a</sup>Fold change following 5  $\mu$ M MitoQ treatment in wild type cells with respect to non-treated control.

<sup>b</sup>Fold change following 5  $\mu$ M MitoQ treatment in *Atg7* knockout cells with respect to non-treated control.

<sup>c</sup>Basal level of gene expression in *Atg7* knockout cells with respect to basal level of wild type (=1).

**Supplementary Table S2: Regulation of antioxidant gene expression following MitoQ treatment in MDA-MB-231 cells depleted of Keap1.**

| Gene name                                    | Symbol            | NTP siRNA<br>MitoQ-treated <sup>a</sup> | Keap1 siRNA<br>MitoQ-treated <sup>b</sup> | Keap1 siRNA<br>Basal levels <sup>c</sup> |
|----------------------------------------------|-------------------|-----------------------------------------|-------------------------------------------|------------------------------------------|
| 24-dehydrocholesterol reductase              | <i>DHCR24</i>     | -2.3362                                 | -2.0513                                   | -1.1846                                  |
| Dual oxidase 1                               | <i>DUOX1</i>      | 1.4299                                  | 2.5428                                    | -1.5436                                  |
| Dual specificity phosphatase 1               | <i>DUSP1</i>      | 4.9088                                  | 4.5751                                    | 1.2432                                   |
| Forkhead box M1                              | <i>FOXO1</i>      | -4.3768                                 | -3.9884                                   | 1.2452                                   |
| Ferritin, heavy polypeptide 1                | <i>FTH1</i>       | 8.8441                                  | 4.113                                     | 2.8805                                   |
| Glutamate-cysteine ligase, catalytic subunit | <i>GCLC</i>       | 4.0941                                  | 1.283                                     | 3.4871                                   |
| Glutamate-cysteine ligase, modifier subunit  | <i>GCLM</i>       | 4.0367                                  | 1.4533                                    | 3.8816                                   |
| Glutathione peroxidase 3 (plasma)            | <i>GPX3</i>       | -2.3113                                 | -4.2539                                   | 1.8415                                   |
| Glutathione reductase                        | <i>GSR</i>        | 2.145                                   | -1.0499                                   | 2.7267                                   |
| Glutathione S-transferase pi 1               | <i>GSTP1</i>      | 1.2822                                  | 3.4292                                    | -2.2642                                  |
| Heme oxygenase (decycling) 1                 | <i>HMOX1</i>      | 8.8221                                  | 2.5077                                    | 7.3908                                   |
| Neutrophil cytosolic factor 2                | <i>NCF2</i>       | 16.858                                  | 6.7034                                    | 4.6693                                   |
| NAD(P)H dehydrogenase, quinone 1             | <i>NQO1</i>       | 2.5671                                  | 1.2212                                    | 2.798                                    |
| Nudix-type motif 1                           | <i>NUDT1</i>      | -1.9038                                 | -2.8535                                   | 1.2183                                   |
| Peroxiredoxin 5                              | <i>PRDX5</i>      | 2.3782                                  | 2.2512                                    | 1.2074                                   |
| Prion protein                                | <i>PRNP</i>       | 2.8399                                  | 2.3299                                    | -1.015                                   |
| Prostaglandin-endoperoxide synthase 2        | <i>PTGS2</i>      | 8.8226                                  | 15.9656                                   | -1.202                                   |
| Ring finger protein 7                        | <i>RNF7</i>       | 2.2849                                  | 2.0984                                    | 1.0319                                   |
| Scavenger receptor class A, member 3         | <i>SCARA3</i>     | -2.5788                                 | -2.953                                    | -1.3939                                  |
| Selenoprotein S                              | <i>SELS</i>       | 2.4118                                  | 2.0514                                    | -1.0724                                  |
| Superoxide dismutase 3, extracellular        | <i>SOD3</i>       | -2.2526                                 | -1.6342                                   | -1.3068                                  |
| Sequestosome 1                               | <i>P62/SQSTM1</i> | 13.091                                  | 5.568                                     | 2.9663                                   |
| Sulfiredoxin 1                               | <i>SRXN1</i>      | 27.8443                                 | 7.8913                                    | 5.4315                                   |
| Thioredoxin                                  | <i>TXN</i>        | 2.1904                                  | 1.3914                                    | 2.0195                                   |
| Thioredoxin reductase 1                      | <i>TXNRD1</i>     | 6.6545                                  | 2.0075                                    | 2.7461                                   |
| Uncoupling protein 2                         | <i>UCP2</i>       | -2.1402                                 | -2.5191                                   | -1.0277                                  |

<sup>a</sup>Fold change following 5  $\mu$ M MitoQ treatment in control cells with NTP siRNA with respect to non-treated control.

<sup>b</sup>Fold change following 5  $\mu$ M MitoQ treatment in cells with knocked-down Keap1 with respect to non-treated control.

<sup>c</sup>Basal level of gene expression in cells depleted of Keap1 with respect to basal level of NTP siRNA cells (= 1).
